# Supplementary material for: On the role of visual experience in mathematical development: Evidence from blind mathematicians
Source: PubMed Central journal article supplement — Dev Cogn Neurosci. 2017 Oct 4;30:314–23. doi: 10.1016/j.dcn.2017.09.007 (PMC5833949; doi:10.1016/j.dcn.2017.09.007), 2017-10-04
Supplement: NIHMS75032-supplement-tables.pdf [file NIHMS75032-supplement-tables.pdf]

Table S2 – Peaks of activation to meaningful math versus meaningful nonmath in experiment 2.

|                               | Math > Nonmath  |     |     |       |                 |     |     |      |                 |     |     |       |                |     |     |      |                  |     |     |       |
|-------------------------------|-----------------|-----|-----|-------|-----------------|-----|-----|------|-----------------|-----|-----|-------|----------------|-----|-----|------|------------------|-----|-----|-------|
|                               | Blind subject A |     |     |       | Blind subject B |     |     |      | Blind subject C |     |     |       | Blind subjects |     |     |      | Sighted subjects |     |     |       |
|                               | x               | y   | z   | t     | x               | y   | z   | t    | x               | y   | z   | t     | x              | y   | z   | t    | x                | y   | z   | t     |
| L IT                          | -56             | -55 | -13 | 10.03 | -47             | -61 | -1  | 7.12 | -56             | -55 | -16 | 6.86  | -56            | -55 | -11 | 5.71 | -56              | -49 | -23 | 10.81 |
| R IT                          | 60              | -57 | -7  | 7.31  | 57              | -51 | -17 | 6.55 | 53              | -66 | -4  | 6.79  |                |     |     |      | 62               | -54 | -10 | 11.37 |
| L IPS                         | -51             | -49 | 57  | 7.83  | -44             | -57 | 42  | 5.87 | -48             | -45 | 55  | 10.39 | -48            | -45 | 54  | 6.97 | -57              | -34 | 48  | 13.46 |
| R IPS                         | 48              | -36 | 55  | 8.97  | 42              | -55 | 55  | 7.49 | 50              | -42 | 57  | 10.95 | 42             | -49 | 64  | 7.35 | 48               | -37 | 48  | 11.62 |
| L occipito-<br>parietal       | -26             | -79 | 27  | 9.97  | -8              | -78 | 42  | 9    | -24             | -76 | 49  | 11.86 | -26            | -78 | 49  | 9.22 | -32              | -82 | 28  | 6.69  |
| R occipito-<br>parietal       |                 |     |     |       | 27              | -76 | 42  | 6.22 | 30              | -69 | 45  | 11.45 | 29             | -63 | 45  | 8.03 | 45               | -75 | 28  | 6.91  |
| R Mid Occipital/<br>Calcarine | 23              | -88 | 6   | 8.98  |                 |     |     |      | 0               | -82 | -2  | 5.11  |                |     |     |      |                  |     |     |       |
| L Mid Occipital               | -20             | -97 | 1   | 7.42  | -33             | -87 | 12  | 7.17 | -8              | -91 | -5  | 3.93  |                |     |     |      |                  |     |     |       |
| L SFS                         |                 |     |     |       |                 |     |     |      |                 |     |     |       |                |     |     |      | -26              | -4  | 60  | 6.36  |
| R SFS                         |                 |     |     |       |                 |     |     |      | 24              | 5   | 67  | 7.98  |                |     |     |      | 29               | 7   | 63  | 6.88  |
| L MFG (BA9)                   | -26             | 8   | 46  | 7.08  |                 |     |     |      | -51             | 8   | 24  | 8.53  | -48            | 8   | 34  | 6.06 | -48              | 8   | 34  | 9.36  |
| R MFG<br>(BA9/BA10)           | 50              | 5   | 42  | 9.00  | 59              | 13  | 31  | 6.2  | 54              | 16  | 42  | 10.26 |                |     |     |      | 48               | 8   | 25  | 8.59  |
| L MFG (BA46)                  | -53             | 32  | 18  | 10.36 | -36             | 55  | 10  | 8.86 | -45             | 41  | 21  | 10.23 |                |     |     |      | -47              | 32  | 31  | 7.96  |
| R MFG (BA46)                  |                 |     |     |       |                 |     |     |      | 42              | 47  | 16  | 9.86  |                |     |     |      | 51               | 41  | 21  | 6.45  |
| L IFG                         |                 |     |     |       |                 |     |     |      |                 |     |     |       | -28            | 55  | 7   | 4.53 |                  |     |     |       |

Table S3 – Correlation between activation and statements imageability in experiment 1.

|                       | Correlation between activation and statements imageability |      |    |      |                 |     |    |      |
|-----------------------|------------------------------------------------------------|------|----|------|-----------------|-----|----|------|
|                       | Blind subject A                                            |      |    |      | Blind subject B |     |    |      |
|                       | x                                                          | y    | z  | t    | x               | y   | z  | t    |
| L inf parietal lobule | -42                                                        | -55  | 51 | 5.38 |                 |     |    |      |
| R inf parietal lobule | 56                                                         | -52  | 46 | 5.7  |                 |     |    |      |
| L parietal sup        | -36                                                        | -61  | 61 | 4.84 |                 |     |    |      |
| R parietal sup        | 29                                                         | -69  | 60 | 5.94 |                 |     |    |      |
| L Occ sup/precuneus   | -30                                                        | -78  | 40 | 6.12 |                 |     |    |      |
| R Occ sup/precuneus   |                                                            |      |    |      | 27              | -76 | 42 | 5.98 |
| L precuneus           | -12                                                        | -76  | 54 | 6.26 |                 |     |    |      |
| R Cuneus              |                                                            |      |    |      | 2               | -79 | 30 | 4.95 |
| L Calcarine           | -13                                                        | -99  | -7 | 4.72 |                 |     |    |      |
| R Calcarine           | 15                                                         | -100 | -7 | 6.03 |                 |     |    |      |
| L middle occipital    |                                                            |      |    |      | -38             | -85 | 30 | 5.24 |
| R middle occipital    |                                                            |      |    |      | 41              | -82 | 25 | 5.35 |
| L MFG (BA6)           | -36                                                        | 14   | 61 | 7.52 |                 |     |    |      |
| R MFG (BA6)           | 45                                                         | 13   | 57 | 6.56 |                 |     |    |      |
| L SFS                 |                                                            |      |    |      | -23             | 17  | 69 | 5.09 |
| R SFS                 |                                                            |      |    |      | 29              | 13  | 69 | 5.48 |
